# Supplementary material for: Are melamine flame retardants in sofas beneficial from a life cycle perspective?
Source: Royal Society of Chemistry journal article supplement (doi:10.1039/d6su00022c), 2026-01-01
Supplement: d6su00022c1.xlsx [file d6su00022c1.xlsx]

## Sheet: Contents
	Supplementary material to:
	Are melamine flame retardants in sofas beneficial from a life cycle perspective?
	Rahul Aggarwal1,*, Rickard Arvidsson1, Gregory Peters1,2
	1: Environmental Systems Analysis, Chalmers University of Technology, Vera Sandbergs Allé 8, 41296, Gothenburg, Sweden
	2: Swedish Life Cycle Center, Department of Environmental and Energy Sciences, Vera Sandbergs Allé 8, 41296, Gothenburg, Sweden
	* Corresponding author. E-mail address: rahula@chalmers.se, +46 72 393 2945
	Contents
	Supplementray Information (SI) 1: USEtox input data and results
	Supplementray Information (SI) 2: Sofa without melamine FR flow chart
	Supplementray Information (SI) 3: Sofa with melamine FR flow chart
	Supplementray Information (SI) 4: LCI dataset
	Supplementray Information (SI) 5: Comparative LCA results at mid-point and end-point level for sofa with and without melamine FR per functional unit
	Supplementray Information (SI) 6: LCIA results from sensitivity analysis.

## Sheet: SI 1-USEtox_Data
	USEtox input substance data
	CAS RN	NAME	SMILES	PesticideTargetClass	PesticideChemClass	MW	pKaChemClass	pKa.gain	pKa.loss	KOW	Koc	KH25C	Pvap25	Sol25	KDOC	KpSS	KpSd	KpSl	kdegA	kdegW	kdegSd	kdegSl	kdissP	kdisswheat	kdissrice	kdisstomato	kdissapple	kdisslettuce	kdisspotato	avlogEC50	ED50inh,noncanc	ED50ing,noncanc	ED50inh,canc	ED50ing,canc	BAFroot	BAFleaf	BTFmeat	BTFmilk	BAFfish	Flagged "indicative" Characterization factor "F"
				-	-	g.mol-1	-	-	-	L.L-1	L.kg-1	Pa.m3.mol-1	Pa	mg.L-1	L.kg-1	L.kg-1	L.kg-1	L.kg-1	s-1	s-1	s-1	s-1	s-1	s-1	s-1	s-1	s-1	s-1	s-1	log(mg.L-1)	kg.lifetime-1	kg.lifetime-1	kg.lifetime-1	kg.lifetime-1	kgveg.kgsoil-1	kgveg.kgsoil-1	d.kgmeat-1	d.kgmilk-1	L.kgfish-1	Dissociating	Inorganics	Uncertainty	Surfactants	Organometallics	Ecotox EF	Cancer EF inh	Cancer EF ing	Non-cancer EF inh	Non-cancer EF ing
	108-78-1	Melamine	NC1=NC(N)=NC(N)=N1	Metabolite	Other pesticide class	126.121	base	8.94	14	0.042658		1.86438e-09	4.78629e-08	3396.78					7.22888e-06	9.97019e-07	1.1078e-07	4.9851e-07	3.47455e-07	5.25894e-07	2.63572e-07	3.72305e-07	2.95732e-07	7.42846e-07	5.90063e-07		0.862312	0.5532	110.671	110.671	0	0	0	0	3.80014
	Results
	CAS RN	Name	Midpoint Human health characterization factor [cases/kgemitted]																											Endpoint Human health characterization factor [DALY/kgemitted]
			Emission to household indoor air			Emission to industrial indoor air			Emission to urban air			Emission to cont. rural air			Emission to cont. freshwater			Emission to cont. sea water			Emission to cont. natural soil			Emission to cont. agric. soil			Application to wheat			Emission to household indoor air			Emission to industrial indoor air			Emission to urban air			Emission to cont. rural air			Emission to cont. freshwater			Emission to cont. sea water			Emission to cont. natural soil
			cancer	non-canc.	total	cancer	non-canc.	total	cancer	non-canc.	total	cancer	non-canc.	total	cancer	non-canc.	total	cancer	non-canc.	total	cancer	non-canc.	total	cancer	non-canc.	total	cancer	non-canc.	total	cancer	non-canc.	total	cancer	non-canc.	total	cancer	non-canc.	total	cancer	non-canc.	total	cancer	non-canc.	total	cancer	non-canc.	total	cancer	non-canc.
	108-78-1	Melamine	1.92008e-05	0.00246669	0.00248589	5.93062e-07	7.85344e-05	7.91275e-05	6.06006e-08	1.02032e-05	1.02638e-05	3.36874e-08	6.7188e-06	6.75249e-06	1.02532e-07	2.05121e-05	2.06146e-05	7.04143e-11	1.40868e-08	1.41572e-08	9.40367e-10	1.88126e-07	1.89067e-07	4.71851e-09	9.43968e-07	9.48687e-07	0.000185815	0.0371734	0.0373592	0.00022081	0.00666006	0.00688087	6.82021e-06	0.000212043	0.000218863	6.96906e-07	2.75486e-05	2.82455e-05	3.87405e-07	1.81408e-05	1.85282e-05	1.17911e-06	5.53827e-05	5.65618e-05	8.09764e-10	3.80344e-08	3.88442e-08	1.08142e-08	5.07941e-07
	108-78-1	Melamine	6.68e-06	n/a	6.68e-06	2.48e-07	n/a	2.48e-07	5.7e-08	n/a	5.7e-08	8.54e-08	n/a	8.54e-08	1.3e-07	n/a	1.3e-07	1.02e-10	n/a	1.02e-10	4.91e-08	n/a	4.91e-08	1.23e-07	n/a	1.23e-07	6.42e-05	n/a	6.42e-05	7.69e-05	n/a	7.69e-05	2.86e-06	n/a	2.86e-06	6.56e-07	n/a	6.56e-07	9.82e-07	n/a	9.82e-07	1.5e-06	n/a	1.5e-06	1.17e-09	n/a	1.17e-09	5.65e-07	n/a
	Melamine human toxicity data
	USEtox Data
	CAS RN	Name	ED50inh,noncanc (kg.lifetime-1)	ED50ing,noncanc (kg.lifetime-1)	ED50inh,carc (kg.lifetime-1)	ED50ing,carc (kg.lifetime-1)
	108-78-1	Melamine	-	-	320.621	320.621
	Data collected
	CAS RN	Name	ED50inh,noncanc (kg.lifetime-1)	ED50ing,noncanc (kg.lifetime-1)	ED50inh,carc (kg.lifetime-1)	ED50ing,carc (kg.lifetime-1)
	108-78-1	Melamine	0.862313	0.5532	110.671	110.671
	Number of harmonized human toxicity non-carcinogenic datapoints
	CAS RN	Name	ED50inh,noncanc	ED50ing,noncanc
	108-78-1	Melamine	9	116
	Number of harmonized human toxicity carcinogenic datapoints
	CAS RN	Name	ED50inh,canc (kg.lifetime-1)	ED50ing,canc (kg.lifetime-1)	target organ specific to ingestion or inhalation?	route-to-route extrapolation	ED50inh,canc (kg.lifetime-1)	ED50ing,canc (kg.lifetime-1)	ED50inh,canc (kg.lifetime-1)	ED50ing,canc (kg.lifetime-1)
	108-78-1	Melamine	110.671	110.671	-	From oral to inhalation	-	110.671	0	8
[truncated: 193 more columns]

## Sheet: SI 4-Dataset
	S.No.	Input data	Dataset used	Source
	1	ABS plastic stands	GLO: market for acrylonitrile-butadiene-styrene copolymer ecoinvent 3.11	Ecoinvent 3.11
	2	Metal screw	GLO: market for steel, low-alloyed, hot rolled ecoinvent 3.11	Ecoinvent 3.11
	3	Metal springs	GLO: market for steel, low-alloyed, hot rolled ecoinvent 3.11	Ecoinvent 3.11
	4	Wooden frames	GLO: market for furniture, wooden ecoinvent 3.11	Ecoinvent 3.11
	5	Furniture production waste	GLO: treatment of waste wood, untreated, municipal incineration ecoinvent 3.11	Ecoinvent 3.11
			RoW: treatment of hazardous waste, hazardous waste incineration, with energy recovery ecoinvent 3.11	Ecoinvent 3.11
			RoW: treatment of waste plastic, mixture, municipal incineration ecoinvent 3.11	Ecoinvent 3.11
			RoW: treatment of waste steel, inert material landfill ecoinvent 3.11	Ecoinvent 3.11
	6	Flame retardant (Melamine) in leather	GLO: market for melamine ecoinvent 3.11	Ecoinvent 3.11
			Emission to industrial indoor air_USEtox_Melamine [Em.ind.airI ]	USEtox 2.14
			Emission to cont. freshwater_USEtox_Melamine [Em.fr.waterC ]	USEtox 2.14
	7	Electricity (PU leather production)	GLO: market group for electricity, medium voltage ecoinvent 3.11	Ecoinvent 3.11
	8	Heat (PU leather production)	GLO: market group for heat, central or small-scale, natural gas ecoinvent 3.11	Ecoinvent 3.11
	9	Polyurethane (PU) leather	GLO: market for polyethylene terephthalate, granulate, amorphous ecoinvent 3.11	Ecoinvent 3.11
			GLO: market for polyurethane, flexible foam, flame retardant ecoinvent 3.11	Ecoinvent 3.11
			Flame retardant (Melamine) in leather	Modelled
			Electricity (PU leather production)	Modelled
			Heat (PU leather production)	Modelled
			Emission to industrial indoor air_USEtox_Melamine [Em.ind.airI ]	USEtox 2.14
			Emission to cont. freshwater_USEtox_Melamine [Em.fr.waterC ]	USEtox 2.14
	10	Electricity in sofa production	GLO: market group for electricity, medium voltage ecoinvent 3.11	Ecoinvent 3.11
	11	Flame retardant (Melamine) in PU foam	GLO: market for melamine ecoinvent 3.11	Ecoinvent 3.11
			Emission to industrial indoor air_USEtox_Melamine [Em.ind.airI ]	USEtox 2.14
			Emission to cont. freshwater_USEtox_Melamine [Em.fr.waterC ]	USEtox 2.14
	12	PU foam	GLO: market for polyurethane, flexible foam, flame retardant ecoinvent 3.11	Ecoinvent 3.11
			Flame retardant (Melamine) in PU foam	Modelled
			Emission to industrial indoor air_USEtox_Melamine [Em.ind.airI ]	USEtox 2.14
			Emission to cont. freshwater_USEtox_Melamine [Em.fr.waterC ]	USEtox 2.14
	13	Manufacturing of a Sofa	Electricity in sofa production	Modelled
			Wooden frames	Modelled
			PU foam	Modelled
			Polyurethane (PU) leather	Modelled
			Metal screw	Modelled
			Metal springs	Modelled
			Furniture production waste	Modelled
			ABS plastic stands	Modelled
			Emission to industrial indoor air_USEtox_Melamine [Em.ind.airI ]	USEtox 2.14
			Emission to cont. freshwater_USEtox_Melamine [Em.fr.waterC ]	USEtox 2.14
	14	Use Phase of a Sofa	Manufacturing of a Sofa	Modelled
			Emission to household indoor air_USEtox_Melamine [Em.hom.airI ]	USEtox 2.14
			Emission to cont. freshwater_USEtox_Melamine [Em.fr.waterC ]	USEtox 2.14
	15	EoL of a Sofa_Landfill	SE: treatment of municipal solid waste, sanitary landfill ecoinvent 3.11	Ecoinvent 3.11
			Emission to cont. natural soil_USEtox_Melamine [Em.nat.soilC ]	USEtox 2.14
	16	EoL of a Sofa_Incineration_Cutoff	SE: treatment of municipal solid waste, municipal incineration ecoinvent 3.11	Ecoinvent 3.11
	17	Recovered electricity	SE: market for electricity, medium voltage ecoinvent 3.11	Ecoinvent 3.11
	18	Recovered heat	SE: heat and power co-generation, wood chips, 6667 kW, state-of-the-art 2014 ecoinvent 3.11	Ecoinvent 3.11
	19	EoL of a Sofa_Incineration (with Avoided Burden)	SE: treatment of municipal solid waste, municipal incineration ecoinvent 3.11	Ecoinvent 3.11
			Recovered electricity	Modelled
			Recovered heat	Modelled

## Sheet: SI 5-LCA results
	Table S1: Comparative LCA results at mid-point level for sofa with and without melamine FR per functional unit
	LCIA method	Impact category	Unit	Sofa without FR	Sofa with FR
	ReCiPe 2016 v1.1 Midpoint (H)	Climate change, default, excl biogenic carbon	kg CO2 eq.	312.5	319.1
		Climate change, incl biogenic carbon	kg CO2 eq.	310.9	322.4
		Fine Particulate Matter Formation	kg PM2.5 eq.	0.45	0.45
		Fossil depletion	kg oil eq.	108	108.8
		Freshwater Consumption	m3	2.4	3.1
		Freshwater ecotoxicity	kg 1,4 DB eq.	56.5	56.6
		Freshwater Eutrophication	kg P eq.	0.1	0.1
		Human toxicity, cancer	kg 1,4-DB eq.	255.5	255.5
		Human toxicity, non-cancer	kg 1,4-DB eq.	1435.7	1438.3
		Ionizing Radiation	kBq Co-60 eq. to air	14.1	13.5
		Land use	annual crop eq.·y	47.6	47.4
		Marine ecotoxicity	kg 1,4-DB eq.	68.9	69
		Marine Eutrophication	kg N eq.	0.03	0.03
		Metal depletion	kg Cu eq.	2.6	2.6
		Photochemical Ozone Formation, Ecosystems	kg NOx eq.	0.77	0.78
		Photochemical Ozone Formation, Human Health	kg NOx eq.	0.73	0.74
		Stratospheric Ozone Depletion	kg CFC-11 eq.	0.00046	0.00042
		Terrestrial Acidification	kg SO2 eq.	0.89	0.93
		Terrestrial ecotoxicity	kg 1,4-DB eq.	923.5	931.9
	USEtox 2.12	Ecotoxicity (recommended and interim)_Updated	CTUe	6700000	6700000
		Human toxicity, cancer (recommended and interim)_Updated	CTUh	0.00034	0.00034
		Human toxicity, non-canc. (recommended and interim)_Updated	CTUh	0.00019	0.0002
	Table S2: Comparative LCA results at end-point level for sofas with and without FRs per functional unit
	LCIA	Impact category	Unit	Sofa without FR	Sofa with FR
	ReCiPe 2016 v1.1	ReCiPe 2016 v1.1 (E)	DALY	0.0037	0.0038
	ReCiPe 2016 v1.1	ReCiPe 2016 v1.1 (H)	DALY	0.00058	0.00059
	ReCiPe 2016 v1.1	ReCiPe 2016 v1.1 (I)	DALY	0.00016	0.00016
	USEtox 2.12	Human toxicity (recommended and interim)_Updated	DALY	0.0045	0.0045
	Fire LCA model	Relative health risk from fatalities from fires	DALY	0.001	-
	USEtox 2.14	Human toxicity from FR (recommended and interim)_Updated	DALY	-	1.3e-05

## Sheet: SI 6_Sensitivity analysis
	Table S3: LCIA results from sensitivity analysis.
	LCIA	Impact categories	Unit	Sofa without FR (Incineration)	Sofa with FR (Incineration)	Sofa with FR (15% FR in PU leather)	Sofa with FR (45% FR in PU leather)	Sofa without FR (Landfill)	Sofa with FR (Landfill)	Sofa without FR (Avoided Burden)	Sofa with FR (Avoided Burden)	Sofa without FR (5 years)	Sofa with FR (5 years)	Sofa without FR (15 years)	Sofa with FR (15 years)	Sofa without FR (0.5 sofas)	Sofa with FR (0.5 sofas)	Sofa without FR (2 sofas)	Sofa with FR (2 sofas)	Sofa with FR (5% FR in PU foam)	Sofa with FR (15% FR in PU foam)
	ReCiPe 2016 v1.1 Midpoint (H)	Climate change, default, excl biogenic carbon	kg CO2 eq.	312.5	319.1	318	320.3	321.9	328.6	299.8	302.7	625	638.3	208.3	212.8	156.2	159.6	625	638.3	318.9	319.4
		Climate change, incl biogenic carbon	kg CO2 eq.	310.9	322.4	321.3	323.6	283	294.5	302.4	305.3	621.9	644.9	207.3	215	155.5	161.2	621.9	644.9	322.1	322.7
		Fine Particulate Matter Formation	kg PM2.5 eq.	0.45	0.45	0.45	0.45	0.44	0.45	0.35	0.35	0.89	0.91	0.3	0.3	0.22	0.23	0.89	0.91	0.45	0.45
		Fossil depletion	kg oil eq.	108	108.8	108.5	109.1	107.8	108.6	100.8	101.5	216.1	217.6	72	72.5	54	54.4	216.1	217.6	108.8	108.9
		Freshwater Consumption	m3	2.4	3.1	3	3.3	2.3	3	2.2	2.9	4.9	6.3	1.6	2.1	1.2	1.6	4.9	6.3	2.9	3.3
		Freshwater ecotoxicity	kg 1,4 DB eq.	56.5	56.6	56.6	56.6	64.5	64.6	55.9	55.9	113	113.2	37.7	37.7	28.2	28.3	113	113.2	56.6	56.6
		Freshwater Eutrophication	kg P eq.	0.1	0.1	0.1	0.1	0.1	0.1	0.1	0.1	0.21	0.2	0.07	0.07	0.05	0.05	0.21	0.2	0.1	0.1
		Human toxicity, cancer	kg 1,4-DB eq.	255.5	255.5	255.4	255.6	252.7	252.7	247.2	247.1	510.9	511	170.3	170.3	127.7	127.7	510.9	511	255.6	255.4
		Human toxicity, non-cancer	kg 1,4-DB eq.	1435.7	1438.3	1437.7	1439	1478.7	1481.3	1319.8	1319.4	2871.4	2876.7	957.1	958.9	717.8	719.2	2871.4	2876.7	1439.2	1437.5
		Ionizing Radiation	kBq Co-60 eq. to air	14.1	13.5	13.6	13.4	14.2	13.6	5.8	5.2	28.1	27	9.4	9	7	6.7	28.1	27	13.7	13.3
		Land use	Annual crop eq.·y	47.6	47.4	47.4	47.4	47.7	47.6	-48	-48.2	95.1	94.8	31.7	31.6	23.8	23.7	95.1	94.8	47.5	47.3
		Marine ecotoxicity	kg 1,4-DB eq.	68.9	69	69	69	78.4	78.6	67.8	67.8	137.8	138	45.9	46	34.4	34.5	137.8	138	69	69
		Marine Eutrophication	kg N eq.	0.03	0.03	0.03	0.03	0.16	0.16	0.03	0.03	0.06	0.06	0.02	0.02	0.02	0.02	0.06	0.06	0.03	0.03
		Metal depletion	kg Cu eq.	2.6	2.6	2.6	2.6	2.6	2.6	2.5	2.5	5.2	5.2	1.7	1.7	1.3	1.3	5.2	5.2	2.6	2.6
		Photochemical Ozone Formation, Ecosystems	kg NOx eq.	0.77	0.78	0.77	0.78	0.74	0.75	0.35	0.35	1.54	1.55	0.51	0.52	0.39	0.39	1.54	1.55	0.78	0.78
		Photochemical Ozone Formation, Human Health	kg NOx eq.	0.73	0.74	0.73	0.74	0.7	0.71	0.31	0.31	1.46	1.47	0.49	0.49	0.36	0.37	1.46	1.47	0.74	0.74
		Stratospheric Ozone Depletion	kg CFC-11 eq.	0.00046	0.00042	0.00043	0.00041	0.00038	0.00034	0.00034	0.0003	0.00093	0.00084	0.00031	0.00028	0.00023	0.00021	0.00093	0.00084	0.00043	0.00041
		Terrestrial Acidification	kg SO2 eq.	0.89	0.93	0.92	0.94	0.89	0.92	0.56	0.6	1.79	1.85	0.6	0.62	0.45	0.46	1.79	1.85	0.92	0.94
		Terrestrial ecotoxicity	kg 1,4-DB eq.	923.5	931.9	930	933.9	915.7	924.2	388.8	394.6	1846.9	1863.8	615.6	621.3	461.7	466	1846.9	1863.8	930.9	932.9
	USEtox 2.12	Ecotoxicity (recommended and interim)_Updated	CTUe	6700000	6700000	6700000	6700000	7200000	7200000	6500000	6500000	13000000	13000000	4500000	4400000	3300000	3300000	13000000	13000000	6700000	6700000
		Human toxicity, cancer (recommended and interim)_Updated	CTUh	0.00034	0.00034	0.00034	0.00034	0.00034	0.00034	0.00033	0.00033	0.00068	0.00069	0.00023	0.00023	0.00017	0.00017	0.00068	0.00069	0.00034	0.00034
		Human toxicity, non-canc. (recommended and interim)_Updated	CTUh	0.00019	0.0002	0.00019	0.0002	0.00019	0.0002	0.00014	0.00014	0.00038	0.00039	0.00013	0.00013	9.6e-05	9.8e-05	0.00038	0.00039	0.00019	0.0002
	ReCiPe 2016 v1.1	ReCiPe 2016 v1.1 (E)	DALY	0.0037	0.0038	0.0038	0.0038	0.0035	0.0036	0.0036	0.0036	0.0075	0.0077	0.0025	0.0026	0.0019	0.0019	0.0075	0.0077	0.0038	0.0038
		ReCiPe 2016 v1.1 (H)	DALY	0.00058	0.00059	0.00059	0.00059	0.00058	0.0006	0.0005	0.00051	0.0012	0.0012	0.00039	0.00039	0.00029	0.00029	0.0012	0.0012	0.00059	0.00059
		ReCiPe 2016 v1.1 (I)	DALY	0.00016	0.00016	0.00016	0.00016	0.00016	0.00017	0.00014	0.00014	0.00032	0.00032	0.00011	0.00011	8e-05	8e-05	0.00032	0.00032	0.00016	0.00016
	USEtox 2.12	Human toxicity (recommended and interim)_Updated	DALY	0.0045	0.0045	0.0045	0.0045	0.0044	0.0044	0.0042	0.0042	0.0089	0.0089	0.003	0.003	0.0022	0.0022	0.0089	0.0089	0.0045	0.0045
	Fire LCA model	Relative health risk from fatalities from fires	DALY	0.001	0	0	0	0.001	0	0.001	0	0.001	0	0.001	0	0.0005	0	0.002	0	0	0
	USEtox 2.12	Human toxicity from FR (recommended and interim)_Updated	DALY	0	1.3e-05	9.8e-06	1.5e-05	0	1.4e-05	0	1.3e-05	0	2.5e-05	0	8.3e-06	0	6.3e-06	0	2.5e-05	9e-06	1.6e-05
